# Supplementary material for: Structure and molecular organization of mammalian fatty acid synthase
Source: Springer Nature journal article supplement (doi:10.1038/nsmb899), 2005-02-13
Supplement: 41594_2005_BFnsmb899_MOESM1_ESM.pdf [file 41594_2005_BFnsmb899_MOESM1_ESM.pdf]

## Supplementary Figure 1.

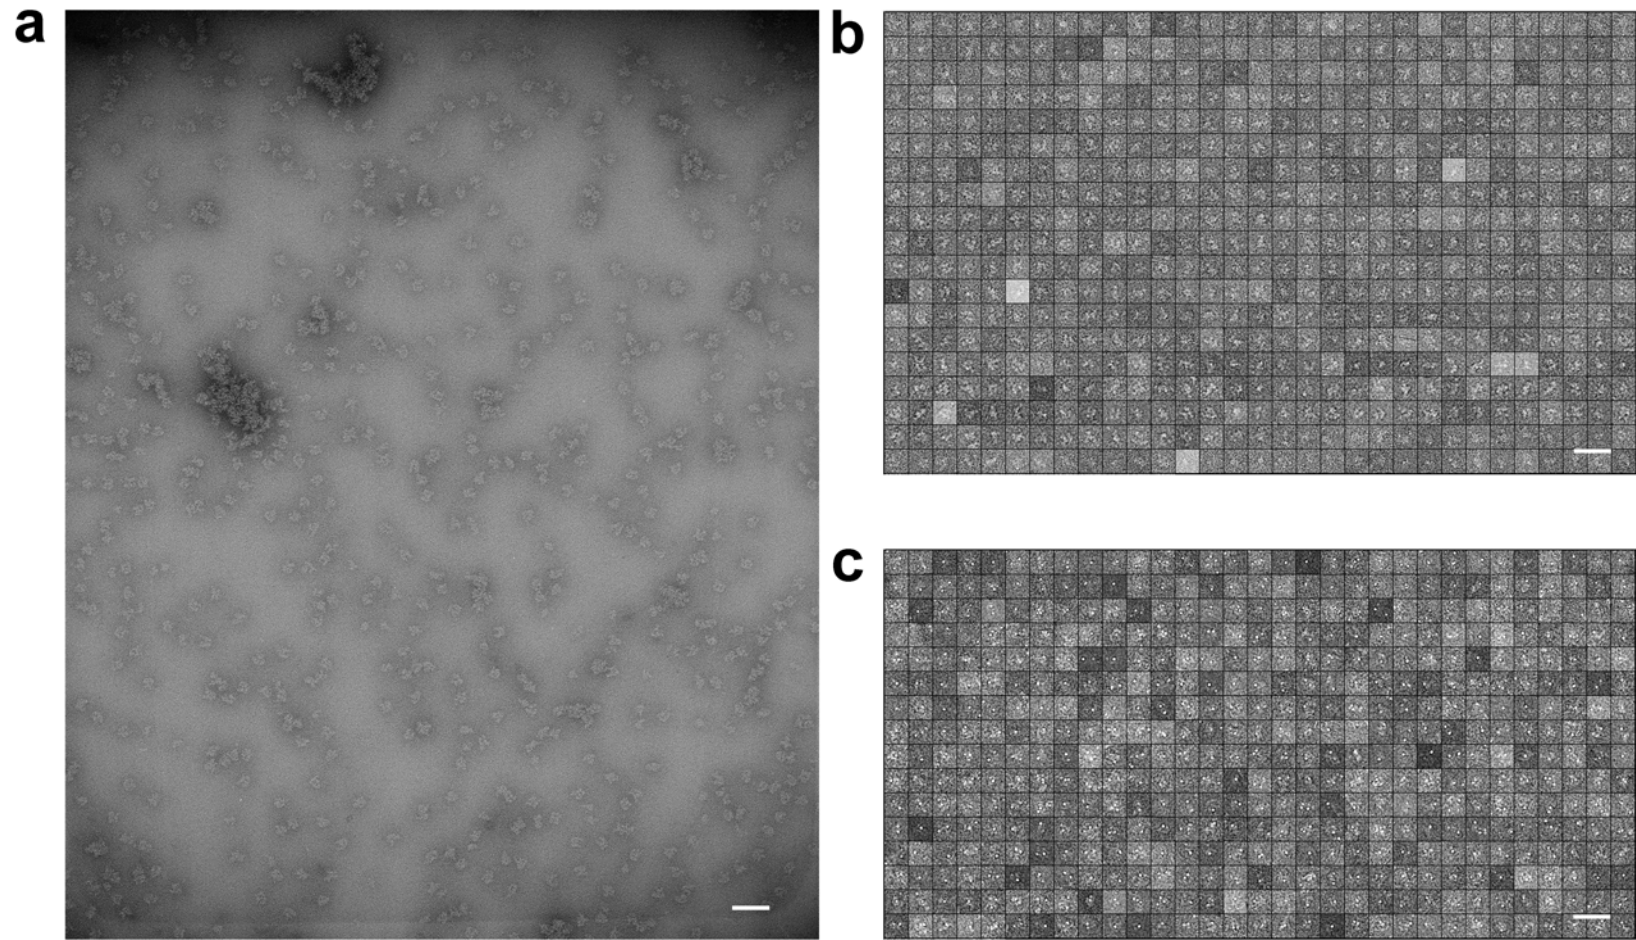

**Supplementary Figure 1** Raw images of FAS particles. **(a)** Micrograph of stained KSQ-FAS in the presence of substrate. **(b)** Unprocessed images of unstained, frozen particles of KSQ-FAS imaged in the presence of substrate. **(c)** Unprocessed images of unstained, frozen particles of KSQ-FAS decorated with Ni<sup>+2</sup>-NTA Nanogold. Scale bars correspond to 500 Å.
