# Supplementary material for: Structure and molecular organization of mammalian fatty acid synthase
Source: Springer Nature journal article supplement (doi:10.1038/nsmb899), 2005-02-13
Supplement: 41594_2005_BFnsmb899_MOESM2_ESM.pdf [file 41594_2005_BFnsmb899_MOESM2_ESM.pdf]

## Supplementary Figure 2.

a

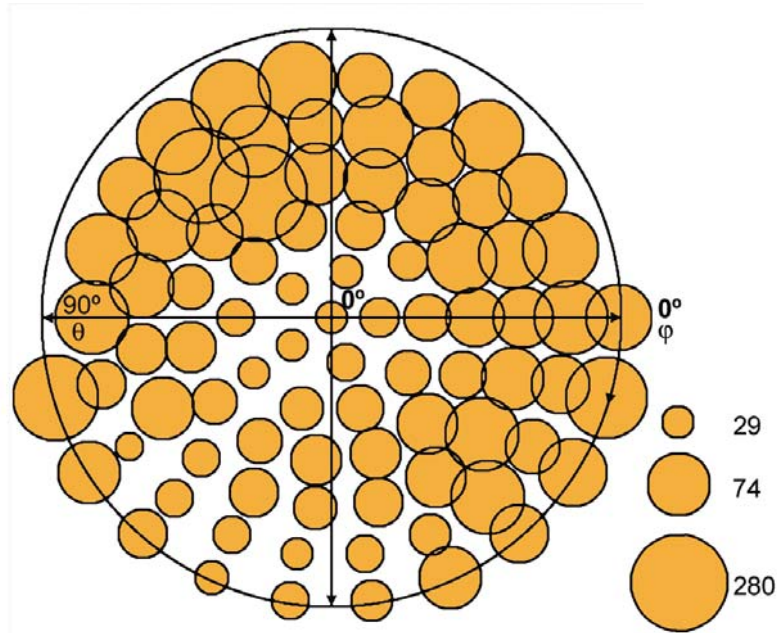

b

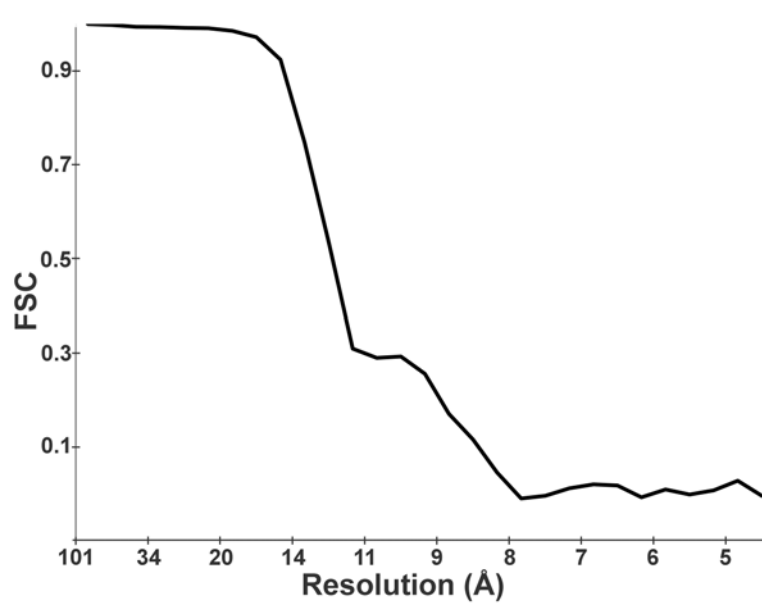

**Supplementary Figure 2** Characteristics of final FAS reconstruction from unstained specimens. **(a)** Distribution of orientations (as a function of  $\theta$  and  $\phi$  Euler angles) for the cryo-image data set. **(b)** Fourier-Shell Correlation plot measuring the resolution of the 3-D reconstruction.
